# Supplementary material for: Single-stranded DNA library preparation for the sequencing of ancient or damaged DNA
Source: Springer Nature journal article supplement (doi:10.1038/nprot.2013.038), 2013-03-14
Supplement: 41596_2013_BFnprot2013038_MOESM474_ESM.pdf [file 41596_2013_BFnprot2013038_MOESM474_ESM.pdf]

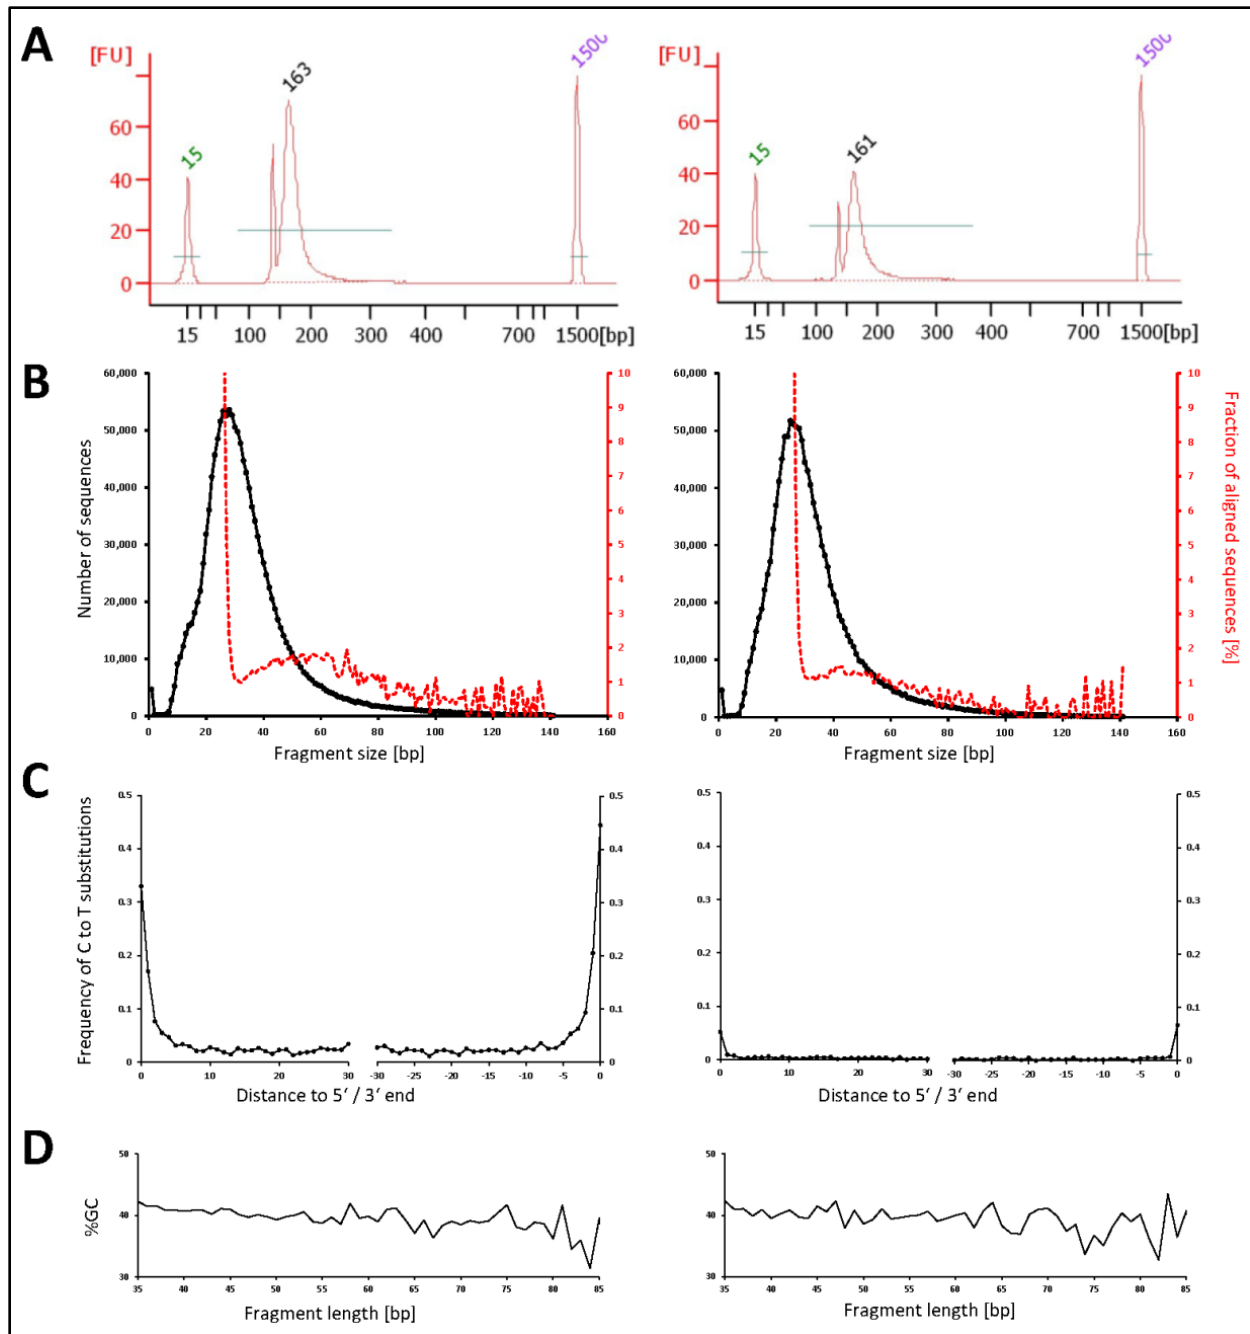

**Characterization of two DNA libraries prepared with and without uracil removal from a Neandertal DNA extract (panels on the right and left, respectively).** A) Fragment length distributions of the amplified libraries obtained from chip electrophoresis using the Bioanalyzer 2100. B) Fragment size distributions obtained from sequencing (the fraction of mapped sequences is indicated by a dotted line). C) Frequency of C to T substitutions around 5' and 3' ends of Neandertal sequences. D) Average GC-content of Neandertal sequences as a function of fragment size.
