# Supplementary material for: Single-stranded DNA library preparation for the sequencing of ancient or damaged DNA
Source: Springer Nature journal article supplement (doi:10.1038/nprot.2013.038), 2013-03-14
Supplement: 41596_2013_BFnprot2013038_MOESM475_ESM.pdf [file 41596_2013_BFnprot2013038_MOESM475_ESM.pdf]

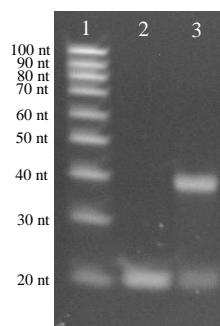

**Quality control of single-stranded adaptor oligonucleotide CL78.** From two independently synthesized batches of the oligonucleotide, 10 pmol were loaded onto a 10% denaturing polyacryl amide gel, next to a size marker (lane 1; 20/100 ladder). The gel was run for 35 min at 200V and stained with SybrGold dye. While no impurities were detected in the first batch (lane 2), the second batch (lane 3) is dominated by a double-length artefact, representing an extreme example of poor oligonucleotide synthesis quality.
