# Supplementary material for: Single-stranded DNA library preparation for the sequencing of ancient or damaged DNA
Source: Springer Nature journal article supplement (doi:10.1038/nprot.2013.038), 2013-03-14
Supplement: 41596_2013_BFnprot2013038_MOESM477_ESM.pdf [file 41596_2013_BFnprot2013038_MOESM477_ESM.pdf]

**Program settings of Cooling-ThermoMixer MKR13 recommended for single-stranded library preparation.** The device may also be used to replace the vortexer in bead resuspension steps (use 'short mix' button).

| <b>Program</b> | <b>Protocol step</b> | <b>Step</b> | <b>Temp.</b> | <b>Rising time</b> | <b>Speed</b> | <b>Pause</b> | <b>Mix</b> | <b>Cycles</b> | <b>Hours</b> | <b>Minutes</b> |
|----------------|----------------------|-------------|--------------|--------------------|--------------|--------------|------------|---------------|--------------|----------------|
| 1              | 14                   | 1           | 15°C         | 00                 | 1500         | 1.0          | 2 sec      | 00            | 00           | 01             |
| 1              | 14                   | 2           | 37°C         | 25                 | 1500         | 1.0          | 2 sec      | 00            | 00           | 30             |
| 2              | 15/19/23             | 1           | 45°C         | 00                 | 1500         | 0.5          | 3 sec      | 00            | 00           | 03             |
| 3              | 18                   | 1           | 25°C         | 00                 | 1500         | 1.0          | 2 sec      | 00            | 00           | 15             |
| 4              | 22                   | 1           | 22°C         | 00                 | 1500         | 1.0          | 2 sec      | 00            | 01           | 00             |
