# Supplementary material for: Single-stranded DNA library preparation for the sequencing of ancient or damaged DNA
Source: Springer Nature journal article supplement (doi:10.1038/nprot.2013.038), 2013-03-14
Supplement: 41596_2013_BFnprot2013038_MOESM478_ESM.pdf [file 41596_2013_BFnprot2013038_MOESM478_ESM.pdf]

**P5 and P7 indexing primers.** An identical set of P7 indexing primers was published before in ref. 21 of the main text.

| Name                       | Sequence (5'-3')                                                | Index as sequenced (5'-3') |
|----------------------------|-----------------------------------------------------------------|----------------------------|
| <b>P5 indexing primers</b> |                                                                 |                            |
| P5_1                       | AATGATACGGCGACCACCGAGATCTACACcctgcgaACACTCTTCCCTACACGACGCTCTT   | TCGCAGG                    |
| P5_2                       | AATGATACGGCGACCACCGAGATCTACACtgcagagACACTCTTCCCTACACGACGCTCTT   | CTCTGCA                    |
| P5_3                       | AATGATACGGCGACCACCGAGATCTACACcacttagACACTCTTCCCTACACGACGCTCTT   | CCTAGGT                    |
| P5_4                       | AATGATACGGCGACCACCGAGATCTACACttgatccACACTCTTCCCTACACGACGCTCTT   | GGATCAA                    |
| P5_5                       | AATGATACGGCGACCACCGAGATCTACACatcttgcACACTCTTCCCTACACGACGCTCTT   | GCAAGAT                    |
| P5_6                       | AATGATACGGCGACCACCGAGATCTACACtctccatACACTCTTCCCTACACGACGCTCTT   | ATGGAGA                    |
| P5_7                       | AATGATACGGCGACCACCGAGATCTACACcatcgagACACTCTTCCCTACACGACGCTCTT   | CTCGATG                    |
| P5_8                       | AATGATACGGCGACCACCGAGATCTACACttcgagcACACTCTTCCCTACACGACGCTCTT   | GCTCGAA                    |
| P5_9                       | AATGATACGGCGACCACCGAGATCTACACagtgggACACTCTTCCCTACACGACGCTCTT    | ACCAACT                    |
| P5_10                      | AATGATACGGCGACCACCGAGATCTACACgtaccggACACTCTTCCCTACACGACGCTCTT   | CCGGTAC                    |
| P5_11                      | AATGATACGGCGACCACCGAGATCTACACcggagttACACTCTTCCCTACACGACGCTCTT   | AACTCCG                    |
| P5_12                      | AATGATACGGCGACCACCGAGATCTACACacttcaaACACTCTTCCCTACACGACGCTCTT   | TTGAAGT                    |
| P5_13                      | AATGATACGGCGACCACCGAGATCTACACtgatagtACACTCTTCCCTACACGACGCTCTT   | ACTATCA                    |
| P5_14                      | AATGATACGGCGACCACCGAGATCTACACgatccaaACACTCTTCCCTACACGACGCTCTT   | TTGGATC                    |
| P5_15                      | AATGATACGGCGACCACCGAGATCTACACcagtcgACACTCTTCCCTACACGACGCTCTT    | CGACCTG                    |
| P5_16                      | AATGATACGGCGACCACCGAGATCTACACcgcatttaACACTCTTCCCTACACGACGCTCTT  | TAATGCG                    |
| P5_17                      | AATGATACGGCGACCACCGAGATCTACACggtacctACACTCTTCCCTACACGACGCTCTT   | AGGTACC                    |
| P5_18                      | AATGATACGGCGACCACCGAGATCTACACggagccaACACTCTTCCCTACACGACGCTCTT   | TGCGTCC                    |
| P5_19                      | AATGATACGGCGACCACCGAGATCTACACggagattACACTCTTCCCTACACGACGCTCTT   | GAATCTC                    |
| P5_20                      | AATGATACGGCGACCACCGAGATCTACACgagcatgACACTCTTCCCTACACGACGCTCTT   | CATGCTC                    |
| P5_21                      | AATGATACGGCGACCACCGAGATCTACACggtgcgtACACTCTTCCCTACACGACGCTCTT   | ACGCAAC                    |
| P5_22                      | AATGATACGGCGACCACCGAGATCTACACccaatgcACACTCTTCCCTACACGACGCTCTT   | GCATTGG                    |
| P5_23                      | AATGATACGGCGACCACCGAGATCTACACcggatcACACTCTTCCCTACACGACGCTCTT    | GATCTCG                    |
| P5_24                      | AATGATACGGCGACCACCGAGATCTACACcatattgACACTCTTCCCTACACGACGCTCTT   | CAATATG                    |
| P5_25                      | AATGATACGGCGACCACCGAGATCTACACgacgtcaACACTCTTCCCTACACGACGCTCTT   | TGACGTC                    |
| P5_26                      | AATGATACGGCGACCACCGAGATCTACACtggcatcACACTCTTCCCTACACGACGCTCTT   | GATGCCA                    |
| P5_27                      | AATGATACGGCGACCACCGAGATCTACACgtaattgACACTCTTCCCTACACGACGCTCTT   | CAATTAC                    |
| P5_28                      | AATGATACGGCGACCACCGAGATCTACACcctatctACACTCTTCCCTACACGACGCTCTT   | AGATAGG                    |
| P5_29                      | AATGATACGGCGACCACCGAGATCTACACcaatcggACACTCTTCCCTACACGACGCTCTT   | CCGATTG                    |
| P5_30                      | AATGATACGGCGACCACCGAGATCTACACcgggcatACACTCTTCCCTACACGACGCTCTT   | ATGCCGC                    |
| P5_31                      | AATGATACGGCGACCACCGAGATCTACACagtactgACACTCTTCCCTACACGACGCTCTT   | CAGTACT                    |
| P5_32                      | AATGATACGGCGACCACCGAGATCTACACtactattACACTCTTCCCTACACGACGCTCTT   | AATAGTA                    |
| P5_33                      | AATGATACGGCGACCACCGAGATCTACACccggatgACACTCTTCCCTACACGACGCTCTT   | CATCCGG                    |
| P5_34                      | AATGATACGGCGACCACCGAGATCTACACaccatgaACACTCTTCCCTACACGACGCTCTT   | TCATGGT                    |
| P5_35                      | AATGATACGGCGACCACCGAGATCTACACcggttctACACTCTTCCCTACACGACGCTCTT   | AGAACCG                    |
| P5_36                      | AATGATACGGCGACCACCGAGATCTACACtattccaACACTCTTCCCTACACGACGCTCTT   | TGGAATA                    |
| P5_37                      | AATGATACGGCGACCACCGAGATCTACACcctcctgACACTCTTCCCTACACGACGCTCTT   | CAGGAGG                    |
| P5_38                      | AATGATACGGCGACCACCGAGATCTACACaggtattACACTCTTCCCTACACGACGCTCTT   | AATACCT                    |
| P5_39                      | AATGATACGGCGACCACCGAGATCTACACgcattgACACTCTTCCCTACACGACGCTCTT    | CGAATGC                    |
| P5_40                      | AATGATACGGCGACCACCGAGATCTACACttcgaaACACTCTTCCCTACACGACGCTCTT    | TTCGCAA                    |
| P5_41                      | AATGATACGGCGACCACCGAGATCTACACttgaattACACTCTTCCCTACACGACGCTCTT   | AATTCAA                    |
| P5_42                      | AATGATACGGCGACCACCGAGATCTACACtgcgagACACTCTTCCCTACACGACGCTCTT    | CGCGCAG                    |
| P5_43                      | AATGATACGGCGACCACCGAGATCTACACagaccttACACTCTTCCCTACACGACGCTCTT   | AAGGTCT                    |
| P5_44                      | AATGATACGGCGACCACCGAGATCTACACgtccagtACACTCTTCCCTACACGACGCTCTT   | ACTGGAC                    |
| P5_45                      | AATGATACGGCGACCACCGAGATCTACACacctgctACACTCTTCCCTACACGACGCTCTT   | AGCAGGT                    |
| P5_46                      | AATGATACGGCGACCACCGAGATCTACACcgggtacACACTCTTCCCTACACGACGCTCTT   | GTACCGG                    |
| P5_47                      | AATGATACGGCGACCACCGAGATCTACACcttgaccACACTCTTCCCTACACGACGCTCTT   | GGTCAAG                    |
| P5_48                      | AATGATACGGCGACCACCGAGATCTACACcatcattACACTCTTCCCTACACGACGCTCTT   | AATGATG                    |
| P5_49                      | AATGATACGGCGACCACCGAGATCTACACtctgactACACTCTTCCCTACACGACGCTCTT   | AGTCAGA                    |
| P5_50                      | AATGATACGGCGACCACCGAGATCTACACtctagtACACTCTTCCCTACACGACGCTCTT    | AACTAGA                    |
| P5_51                      | AATGATACGGCGACCACCGAGATCTACACgcccagtagACACTCTTCCCTACACGACGCTCTT | CTATGGA                    |
| P5_52                      | AATGATACGGCGACCACCGAGATCTACACaccgtcgACACTCTTCCCTACACGACGCTCTT   | CGACGGT                    |
| P5_53                      | AATGATACGGCGACCACCGAGATCTACACcttggttACACTCTTCCCTACACGACGCTCTT   | AACCAAG                    |
| P5_54                      | AATGATACGGCGACCACCGAGATCTACACtacgccgACACTCTTCCCTACACGACGCTCTT   | CGGCGTA                    |
| P5_55                      | AATGATACGGCGACCACCGAGATCTACACggactgcACACTCTTCCCTACACGACGCTCTT   | GCAGTCC                    |

|       |                                                                             |         |
|-------|-----------------------------------------------------------------------------|---------|
| P5_56 | AATGATACGGCGACCACCGAGATCTACACg <sub>cgcgag</sub> ACACTCTTTCCCTACACGACGCTCTT | CTCGCGC |
| P5_57 | AATGATACGGCGACCACCGAGATCTACACg <sub>tcgag</sub> ACACTCTTTCCCTACACGACGCTCTT  | CTGCGAC |
| P5_58 | AATGATACGGCGACCACCGAGATCTACACc <sub>atagct</sub> ACACTCTTTCCCTACACGACGCTCTT | ACGTATG |
| P5_59 | AATGATACGGCGACCACCGAGATCTACACt <sub>cagat</sub> ACACTCTTTCCCTACACGACGCTCTT  | ATACTGA |
| P5_60 | AATGATACGGCGACCACCGAGATCTACACc <sub>taagta</sub> ACACTCTTTCCCTACACGACGCTCTT | TACTTAG |
| P5_61 | AATGATACGGCGACCACCGAGATCTACACt <sub>atgatt</sub> ACACTCTTTCCCTACACGACGCTCTT | AAGCTAA |
| P5_62 | AATGATACGGCGACCACCGAGATCTACACc <sub>gcccgc</sub> ACACTCTTTCCCTACACGACGCTCTT | GACGGCG |
| P5_63 | AATGATACGGCGACCACCGAGATCTACACg <sub>ctctct</sub> ACACTCTTTCCCTACACGACGCTCTT | AGAAGAC |
| P5_64 | AATGATACGGCGACCACCGAGATCTACACg <sub>ccggac</sub> ACACTCTTTCCCTACACGACGCTCTT | GTCCGGC |
| P5_65 | AATGATACGGCGACCACCGAGATCTACACa <sub>agtgga</sub> ACACTCTTTCCCTACACGACGCTCTT | TCAGCTT |
| P5_66 | AATGATACGGCGACCACCGAGATCTACACg <sub>gcctct</sub> ACACTCTTTCCCTACACGACGCTCTT | AGAGCGC |
| P5_67 | AATGATACGGCGACCACCGAGATCTACACc <sub>gttagc</sub> ACACTCTTTCCCTACACGACGCTCTT | GCCTACG |
| P5_68 | AATGATACGGCGACCACCGAGATCTACACt <sub>agatta</sub> ACACTCTTTCCCTACACGACGCTCTT | TAATCAT |
| P5_69 | AATGATACGGCGACCACCGAGATCTACACg <sub>cagggt</sub> ACACTCTTTCCCTACACGACGCTCTT | AACCTGC |
| P5_70 | AATGATACGGCGACCACCGAGATCTACACa <sub>atcgtc</sub> ACACTCTTTCCCTACACGACGCTCTT | GACGATT |
| P5_71 | AATGATACGGCGACCACCGAGATCTACACg <sub>ccgcta</sub> ACACTCTTTCCCTACACGACGCTCTT | TAGGCCG |
| P5_72 | AATGATACGGCGACCACCGAGATCTACACt <sub>atgcc</sub> ACACTCTTTCCCTACACGACGCTCTT  | GGCATAG |
| P5_73 | AATGATACGGCGACCACCGAGATCTACACg <sub>gttgaa</sub> ACACTCTTTCCCTACACGACGCTCTT | TTCAACC |
| P5_74 | AATGATACGGCGACCACCGAGATCTACACg <sub>agttaa</sub> ACACTCTTTCCCTACACGACGCTCTT | TTAATTC |
| P5_75 | AATGATACGGCGACCACCGAGATCTACACt <sub>agacta</sub> ACACTCTTTCCCTACACGACGCTCTT | TACTCTA |
| P5_76 | AATGATACGGCGACCACCGAGATCTACACt <sub>ctagca</sub> ACACTCTTTCCCTACACGACGCTCTT | TGCATGA |
| P5_77 | AATGATACGGCGACCACCGAGATCTACACg <sub>cttatt</sub> ACACTCTTTCCCTACACGACGCTCTT | AATAAGC |
| P5_78 | AATGATACGGCGACCACCGAGATCTACACc <sub>aaggct</sub> ACACTCTTTCCCTACACGACGCTCTT | AGCCTTG |
| P5_79 | AATGATACGGCGACCACCGAGATCTACACa <sub>ggtggg</sub> ACACTCTTTCCCTACACGACGCTCTT | CCAACCT |
| P5_80 | AATGATACGGCGACCACCGAGATCTACACt <sub>ctctgc</sub> ACACTCTTTCCCTACACGACGCTCTT | GCAGAAG |
| P5_81 | AATGATACGGCGACCACCGAGATCTACACt <sub>aattct</sub> ACACTCTTTCCCTACACGACGCTCTT | AGAATTA |
| P5_82 | AATGATACGGCGACCACCGAGATCTACACg <sub>atgctg</sub> ACACTCTTTCCCTACACGACGCTCTT | CAGCATC |
| P5_83 | AATGATACGGCGACCACCGAGATCTACACc <sub>ctagaa</sub> ACACTCTTTCCCTACACGACGCTCTT | TTCTAGG |
| P5_84 | AATGATACGGCGACCACCGAGATCTACACt <sub>ctagag</sub> ACACTCTTTCCCTACACGACGCTCTT | CCTCTAG |
| P5_85 | AATGATACGGCGACCACCGAGATCTACACt <sub>atccgg</sub> ACACTCTTTCCCTACACGACGCTCTT | CCGGATA |
| P5_86 | AATGATACGGCGACCACCGAGATCTACACa <sub>ggcggc</sub> ACACTCTTTCCCTACACGACGCTCTT | GCCGCCT |
| P5_87 | AATGATACGGCGACCACCGAGATCTACACg <sub>gtcgtt</sub> ACACTCTTTCCCTACACGACGCTCTT | AACGACC |
| P5_88 | AATGATACGGCGACCACCGAGATCTACACc <sub>ccgtgg</sub> ACACTCTTTCCCTACACGACGCTCTT | CCAGCGG |
| P5_89 | AATGATACGGCGACCACCGAGATCTACACg <sub>gaacta</sub> ACACTCTTTCCCTACACGACGCTCTT | TAGTTC  |
| P5_90 | AATGATACGGCGACCACCGAGATCTACACt <sub>tgcca</sub> ACACTCTTTCCCTACACGACGCTCTT  | TGGCAAT |
| P5_91 | AATGATACGGCGACCACCGAGATCTACACa <sub>tatacg</sub> ACACTCTTTCCCTACACGACGCTCTT | CGTATAT |
| P5_92 | AATGATACGGCGACCACCGAGATCTACACg <sub>attagc</sub> ACACTCTTTCCCTACACGACGCTCTT | GCTAATC |
| P5_93 | AATGATACGGCGACCACCGAGATCTACACa <sub>gaagtc</sub> ACACTCTTTCCCTACACGACGCTCTT | GACTTCT |
| P5_94 | AATGATACGGCGACCACCGAGATCTACACa <sub>tagtac</sub> ACACTCTTTCCCTACACGACGCTCTT | GTACTAT |
| P5_95 | AATGATACGGCGACCACCGAGATCTACACg <sub>atctcg</sub> ACACTCTTTCCCTACACGACGCTCTT | CGAGATC |
| P5_96 | AATGATACGGCGACCACCGAGATCTACACg <sub>gctcgc</sub> ACACTCTTTCCCTACACGACGCTCTT | CGCAGCC |

---

**P7 indexing primers**

|       |                                                                    |         |
|-------|--------------------------------------------------------------------|---------|
| P7_1  | CAAGCAGAAGACGGCATAACGAGATc <sub>ctgcga</sub> GTGACTGGAGTTCAGACGTGT | TCGCAGG |
| P7_2  | CAAGCAGAAGACGGCATAACGAGATt <sub>gcagag</sub> GTGACTGGAGTTCAGACGTGT | CTCTGCA |
| P7_3  | CAAGCAGAAGACGGCATAACGAGATa <sub>cttagg</sub> GTGACTGGAGTTCAGACGTGT | CCTAGGT |
| P7_4  | CAAGCAGAAGACGGCATAACGAGATt <sub>tgatcc</sub> GTGACTGGAGTTCAGACGTGT | GGATCAA |
| P7_5  | CAAGCAGAAGACGGCATAACGAGATa <sub>tcttgc</sub> GTGACTGGAGTTCAGACGTGT | GCAAGAT |
| P7_6  | CAAGCAGAAGACGGCATAACGAGATt <sub>ctccat</sub> GTGACTGGAGTTCAGACGTGT | ATGGAGA |
| P7_7  | CAAGCAGAAGACGGCATAACGAGATc <sub>atcgag</sub> GTGACTGGAGTTCAGACGTGT | CTCGATG |
| P7_8  | CAAGCAGAAGACGGCATAACGAGATt <sub>tcgagc</sub> GTGACTGGAGTTCAGACGTGT | GCTCGAA |
| P7_9  | CAAGCAGAAGACGGCATAACGAGATa <sub>gttggt</sub> GTGACTGGAGTTCAGACGTGT | ACCAACT |
| P7_10 | CAAGCAGAAGACGGCATAACGAGATg <sub>taccgg</sub> GTGACTGGAGTTCAGACGTGT | CCGGTAC |
| P7_11 | CAAGCAGAAGACGGCATAACGAGATc <sub>ggagtt</sub> GTGACTGGAGTTCAGACGTGT | AACTCCG |
| P7_12 | CAAGCAGAAGACGGCATAACGAGATa <sub>cttcaa</sub> GTGACTGGAGTTCAGACGTGT | TTGAAGT |
| P7_13 | CAAGCAGAAGACGGCATAACGAGATg <sub>atagtt</sub> GTGACTGGAGTTCAGACGTGT | ATAATCA |
| P7_14 | CAAGCAGAAGACGGCATAACGAGATg <sub>atccaa</sub> GTGACTGGAGTTCAGACGTGT | TTGGATC |
| P7_15 | CAAGCAGAAGACGGCATAACGAGATc <sub>aggtcg</sub> GTGACTGGAGTTCAGACGTGT | CGACCTG |
| P7_16 | CAAGCAGAAGACGGCATAACGAGATc <sub>gcatta</sub> GTGACTGGAGTTCAGACGTGT | TAATGCG |
| P7_17 | CAAGCAGAAGACGGCATAACGAGATg <sub>gtacct</sub> GTGACTGGAGTTCAGACGTGT | AGGTACC |
| P7_18 | CAAGCAGAAGACGGCATAACGAGATg <sub>gacgca</sub> GTGACTGGAGTTCAGACGTGT | TGCGTCC |
| P7_19 | CAAGCAGAAGACGGCATAACGAGATg <sub>agattc</sub> GTGACTGGAGTTCAGACGTGT | GAATCTC |

|       |                                                         |         |
|-------|---------------------------------------------------------|---------|
| P7_20 | CAAGCAGAAGACGGCATAACGAGATgagcatgGTGACTGGAGTTCAGACGTGT   | CATGCTC |
| P7_21 | CAAGCAGAAGACGGCATAACGAGATgttgctgGTGACTGGAGTTCAGACGTGT   | ACGCAAC |
| P7_22 | CAAGCAGAAGACGGCATAACGAGATtccaatgcGTGACTGGAGTTCAGACGTGT  | GCATTGG |
| P7_23 | CAAGCAGAAGACGGCATAACGAGATcgagatcGTGACTGGAGTTCAGACGTGT   | GATCTCG |
| P7_24 | CAAGCAGAAGACGGCATAACGAGATcatattgGTGACTGGAGTTCAGACGTGT   | CAATATG |
| P7_25 | CAAGCAGAAGACGGCATAACGAGATgagctcaGTGACTGGAGTTCAGACGTGT   | TGACGTC |
| P7_26 | CAAGCAGAAGACGGCATAACGAGATtggcaccGTGACTGGAGTTCAGACGTGT   | GATGCCA |
| P7_27 | CAAGCAGAAGACGGCATAACGAGATgtaattgGTGACTGGAGTTCAGACGTGT   | CAATTAC |
| P7_28 | CAAGCAGAAGACGGCATAACGAGATtctatctGTGACTGGAGTTCAGACGTGT   | AGATAGG |
| P7_29 | CAAGCAGAAGACGGCATAACGAGATtcaatcggGTGACTGGAGTTCAGACGTGT  | CCGATTG |
| P7_30 | CAAGCAGAAGACGGCATAACGAGATgctggcatGTGACTGGAGTTCAGACGTGT  | ATGCCGC |
| P7_31 | CAAGCAGAAGACGGCATAACGAGATagtactgGTGACTGGAGTTCAGACGTGT   | CAGTACT |
| P7_32 | CAAGCAGAAGACGGCATAACGAGATtactattGTGACTGGAGTTCAGACGTGT   | AATAGTA |
| P7_33 | CAAGCAGAAGACGGCATAACGAGATtccgatgGTGACTGGAGTTCAGACGTGT   | CATCCGG |
| P7_34 | CAAGCAGAAGACGGCATAACGAGATtaccatgaGTGACTGGAGTTCAGACGTGT  | TCATGGT |
| P7_35 | CAAGCAGAAGACGGCATAACGAGATtggttctGTGACTGGAGTTCAGACGTGT   | AGAACCG |
| P7_36 | CAAGCAGAAGACGGCATAACGAGATtattccaGTGACTGGAGTTCAGACGTGT   | TGGAATA |
| P7_37 | CAAGCAGAAGACGGCATAACGAGATtctctctgGTGACTGGAGTTCAGACGTGT  | CAGGAGG |
| P7_38 | CAAGCAGAAGACGGCATAACGAGATtaggtattGTGACTGGAGTTCAGACGTGT  | AATACCT |
| P7_39 | CAAGCAGAAGACGGCATAACGAGATgcattcgGTGACTGGAGTTCAGACGTGT   | CGAATGC |
| P7_40 | CAAGCAGAAGACGGCATAACGAGATttgcgaaGTGACTGGAGTTCAGACGTGT   | TTCGCAA |
| P7_41 | CAAGCAGAAGACGGCATAACGAGATtgaattGTGACTGGAGTTCAGACGTGT    | AATTCAA |
| P7_42 | CAAGCAGAAGACGGCATAACGAGATctgcgcgGTGACTGGAGTTCAGACGTGT   | CGCGCAG |
| P7_43 | CAAGCAGAAGACGGCATAACGAGATtagacctGTGACTGGAGTTCAGACGTGT   | AAGGTCT |
| P7_44 | CAAGCAGAAGACGGCATAACGAGATgtccagtGTGACTGGAGTTCAGACGTGT   | ACTGGAC |
| P7_45 | CAAGCAGAAGACGGCATAACGAGATtacctgtGTGACTGGAGTTCAGACGTGT   | AGCAGGT |
| P7_46 | CAAGCAGAAGACGGCATAACGAGATtccggtacGTGACTGGAGTTCAGACGTGT  | GTACCGG |
| P7_47 | CAAGCAGAAGACGGCATAACGAGATtctgaccGTGACTGGAGTTCAGACGTGT   | GGTCAAG |
| P7_48 | CAAGCAGAAGACGGCATAACGAGATtcatcattGTGACTGGAGTTCAGACGTGT  | AATGATG |
| P7_49 | CAAGCAGAAGACGGCATAACGAGATtctgactGTGACTGGAGTTCAGACGTGT   | AGTCAGA |
| P7_50 | CAAGCAGAAGACGGCATAACGAGATtctagttGTGACTGGAGTTCAGACGTGT   | AACTAGA |
| P7_51 | CAAGCAGAAGACGGCATAACGAGATgcatatgGTGACTGGAGTTCAGACGTGT   | CTATGGC |
| P7_52 | CAAGCAGAAGACGGCATAACGAGATtaccgtcgGTGACTGGAGTTCAGACGTGT  | CGACGGT |
| P7_53 | CAAGCAGAAGACGGCATAACGAGATtcttggtGTGACTGGAGTTCAGACGTGT   | AACCAAG |
| P7_54 | CAAGCAGAAGACGGCATAACGAGATtaccgctGTGACTGGAGTTCAGACGTGT   | CGCGGTA |
| P7_55 | CAAGCAGAAGACGGCATAACGAGATtggactgcGTGACTGGAGTTCAGACGTGT  | GCAGTCC |
| P7_56 | CAAGCAGAAGACGGCATAACGAGATtgcgagGTGACTGGAGTTCAGACGTGT    | CTCGCGC |
| P7_57 | CAAGCAGAAGACGGCATAACGAGATtgcgagGTGACTGGAGTTCAGACGTGT    | CTGCGAC |
| P7_58 | CAAGCAGAAGACGGCATAACGAGATtcatcgtGTGACTGGAGTTCAGACGTGT   | ACGTATG |
| P7_59 | CAAGCAGAAGACGGCATAACGAGATtctagatGTGACTGGAGTTCAGACGTGT   | ATACTGA |
| P7_60 | CAAGCAGAAGACGGCATAACGAGATtctaagtaGTGACTGGAGTTCAGACGTGT  | TACTTAG |
| P7_61 | CAAGCAGAAGACGGCATAACGAGATttagcttGTGACTGGAGTTCAGACGTGT   | AAGCTAA |
| P7_62 | CAAGCAGAAGACGGCATAACGAGATtgcgctcGTGACTGGAGTTCAGACGTGT   | GACGGCG |
| P7_63 | CAAGCAGAAGACGGCATAACGAGATgtctctGTGACTGGAGTTCAGACGTGT    | AGAAGAC |
| P7_64 | CAAGCAGAAGACGGCATAACGAGATtgcggacGTGACTGGAGTTCAGACGTGT   | GTCCGGC |
| P7_65 | CAAGCAGAAGACGGCATAACGAGATttagctgaGTGACTGGAGTTCAGACGTGT  | TCAGCTT |
| P7_66 | CAAGCAGAAGACGGCATAACGAGATtgcctctGTGACTGGAGTTCAGACGTGT   | AGAGCGC |
| P7_67 | CAAGCAGAAGACGGCATAACGAGATtcttaggcGTGACTGGAGTTCAGACGTGT  | GCTACCG |
| P7_68 | CAAGCAGAAGACGGCATAACGAGATtattgattaGTGACTGGAGTTCAGACGTGT | TAATCAT |
| P7_69 | CAAGCAGAAGACGGCATAACGAGATtgcaggtGTGACTGGAGTTCAGACGTGT   | AACCTGC |
| P7_70 | CAAGCAGAAGACGGCATAACGAGATtattcgtGTGACTGGAGTTCAGACGTGT   | GACGATT |
| P7_71 | CAAGCAGAAGACGGCATAACGAGATtgcgctaGTGACTGGAGTTCAGACGTGT   | TAGGCCG |
| P7_72 | CAAGCAGAAGACGGCATAACGAGATtctatgccGTGACTGGAGTTCAGACGTGT  | GGCATAG |
| P7_73 | CAAGCAGAAGACGGCATAACGAGATtggttgaaGTGACTGGAGTTCAGACGTGT  | TTCAACC |
| P7_74 | CAAGCAGAAGACGGCATAACGAGATttagttaaGTGACTGGAGTTCAGACGTGT  | TTAACTC |
| P7_75 | CAAGCAGAAGACGGCATAACGAGATttagactaGTGACTGGAGTTCAGACGTGT  | TGATCTA |
| P7_76 | CAAGCAGAAGACGGCATAACGAGATtcatgcaGTGACTGGAGTTCAGACGTGT   | TGCATGA |
| P7_77 | CAAGCAGAAGACGGCATAACGAGATtcttattGTGACTGGAGTTCAGACGTGT   | AATAAGC |
| P7_78 | CAAGCAGAAGACGGCATAACGAGATtcaaggctGTGACTGGAGTTCAGACGTGT  | AGCCTTG |
| P7_79 | CAAGCAGAAGACGGCATAACGAGATttagttggGTGACTGGAGTTCAGACGTGT  | CCAACCT |
| P7_80 | CAAGCAGAAGACGGCATAACGAGATtcttctgcGTGACTGGAGTTCAGACGTGT  | GCAGAAG |
| P7_81 | CAAGCAGAAGACGGCATAACGAGATtattctGTGACTGGAGTTCAGACGTGT    | AGAATTA |

|       |                                                       |         |
|-------|-------------------------------------------------------|---------|
| P7_82 | CAAGCAGAAGACGGCATAACGAGATgatgctgGTGACTGGAGTTCAGACGTGT | CAGCATC |
| P7_83 | CAAGCAGAAGACGGCATAACGAGATcctagaaGTGACTGGAGTTCAGACGTGT | TTCTAGG |
| P7_84 | CAAGCAGAAGACGGCATAACGAGATctagaggGTGACTGGAGTTCAGACGTGT | CCTCTAG |
| P7_85 | CAAGCAGAAGACGGCATAACGAGATtatccggGTGACTGGAGTTCAGACGTGT | CCGATA  |
| P7_86 | CAAGCAGAAGACGGCATAACGAGATagcggcGTGACTGGAGTTCAGACGTGT  | GCCGCCT |
| P7_87 | CAAGCAGAAGACGGCATAACGAGATggtcgttGTGACTGGAGTTCAGACGTGT | AACGACC |
| P7_88 | CAAGCAGAAGACGGCATAACGAGATccgctggGTGACTGGAGTTCAGACGTGT | CCAGCGG |
| P7_89 | CAAGCAGAAGACGGCATAACGAGATggaactaGTGACTGGAGTTCAGACGTGT | TAGTTCC |
| P7_90 | CAAGCAGAAGACGGCATAACGAGATattgccaGTGACTGGAGTTCAGACGTGT | TGGCAAT |
| P7_91 | CAAGCAGAAGACGGCATAACGAGATatatacgGTGACTGGAGTTCAGACGTGT | CGTATAT |
| P7_92 | CAAGCAGAAGACGGCATAACGAGAtgattagcGTGACTGGAGTTCAGACGTGT | GCTAATC |
| P7_93 | CAAGCAGAAGACGGCATAACGAGAtagaagtcGTGACTGGAGTTCAGACGTGT | GACTTCT |
| P7_94 | CAAGCAGAAGACGGCATAACGAGAtatagtacGTGACTGGAGTTCAGACGTGT | GTACTAT |
| P7_95 | CAAGCAGAAGACGGCATAACGAGAtgatctcgGTGACTGGAGTTCAGACGTGT | CGAGATC |
| P7_96 | CAAGCAGAAGACGGCATAACGAGAtggctgegGTGACTGGAGTTCAGACGTGT | CGCAGCC |

---
